# Supplementary material for: Broad activation of the ubiquitin–proteasome system by Parkin is critical for mitophagy
Source: PubMed Central journal article supplement — Hum Mol Genet. 2011 Feb 4;20(9):1726–37. doi: 10.1093/hmg/ddr048 (PMC3071670; doi:10.1093/hmg/ddr048), 2011-02-04

## Supplemental Figure Legends

**Figure S1. Parkin-mediated proteolysis of mitochondrial outer membrane proteins is dependent on the ubiquitin ligase activity of Parkin and is induced by disruption of the electrical potential of mitochondria.**

(A) Lack of Parkin expression in parental HeLa S3 cells. Total cell lysates were isolated from HeLa S3 and HeLa S3 cells expressing exogenous Parkin. Immunoblots were probed with antibodies against Parkin and actin (loading control). (B) Less efficient proteolysis by the Parkin mutant R275W. Clonal HeLa S3 cells exogenously expressing wild-type Parkin or the ubiquitin ligase mutant R275W were treated with 20  $\mu$ M CCCP for the indicated time. Total cell lysates were isolated, and immunoblot analysis was used to detect the indicated proteins. (C) Outer membrane protein proteolysis induced by valinomycin but not rotenone. Clonal HeLa S3 cells expressing Parkin or the parental HeLa S3 cells were treated with DMSO (vehicle), 2  $\mu$ M valinomycin, or 200 nM rotenone for the indicated times. Total cell lysates were isolated, and the indicated proteins were detected by immunoblot analysis.

**Figure S2. Overexpression of the K48R ubiquitin mutant partially suppresses mitophagy in Parkin-expressing HeLa cells.**

Clonal HeLa cells expressing Parkin were transiently transfected with GFP-tagged wild-type or K48R ubiquitin. 48 hours post-transfection, cells were treated with a 100 min pulse of 20  $\mu$ M CCCP. 24 hours after the CCCP pulse, cells were fixed and immunostained for Hsp60. Cells that showed complete mitophagy were identified as

GFP-positive cells that were negative for Hsp60. Error bars represent standard errors from 3 independent experiments; 500 cells were analyzed per experiment. The p-value was calculated by a 2-tail student *t* test.

**Figure S3. Parkin-dependent degradation of Tom20 and dispersion of mitochondria.**

(A) Parental HeLa cells do not show CCCP-induced loss of Tom20. HeLa cells not expressing Parkin were treated with DMSO (control) or 20  $\mu$ M CCCP for 4 hours. Fixed cells were stained for Tom20 (red), Hsp60 (green), and nuclei (DAPI, blue). Insets show enlarged views of the boxed area. Note that, without exogenous Parkin expression, HeLa cells do not show accumulation of Tom20-negative mitochondria or mitochondrial aggregation in response to CCCP. (B) Degradation of Tom20 in Parkin-expressing cells induced by CCCP. Parkin-expressing HeLa cells were treated with 20  $\mu$ M CCCP for 4 hours (upper panel) or 24 hours (lower panel). Fixed cells were stained for Tom20 (red), the matrix protein TRAP-1 (green), and nuclei (DAPI, blue). In the bottom panel, the mitochondrial aggregate is Tom20-negative but Hsp60-positive. (C) Same as (B), except a different matrix protein F<sub>1</sub> $\beta$  (green) was detected. Note the presence of Tom20-negative/Hsp60-positive mitochondria. (D) Temporal dynamics of Tom20-negative/Hsp60-positive mitochondria. Parkin-expressing HeLa cells were pretreated with DMSO (vehicle) or the proteasome inhibitor epoxomicin (2  $\mu$ M) for 2 hours prior to treatment with CCCP (20  $\mu$ M) for the indicated times. Fixed cells were stained for Tom20 (red), Hsp60 (green), and nuclei (DAPI, blue). Scale bars equal 10  $\mu$ m.

**Figure S4. Inhibition of the 26S proteasome does not inhibit Parkin translocation to mitochondria, but inhibits mitophagy in HeLa, SH-SY5Y, and MEF cells.**

(A) Inhibition of the 26S proteasome does not affect Parkin translocation to mitochondria. Parkin-expressing HeLa cells were pre-treated with DMSO (vehicle) or 20  $\mu$ M MG132 for 2 hours, followed by incubation in the presence or absence of CCCP (20  $\mu$ M) for 4 hours. Formalin-fixed cells were stained for Hsp60 (green), Parkin (red), and nuclei (DAPI, blue). Scale bar equals 10  $\mu$ m. (B) Quantitation of the experiment in (A). Parkin translocation to mitochondria was scored by co-localization with Hsp60. Results represent the mean from 2 independent experiments; 100 cells were scored per experiment. (C) The proteasome inhibitor epoxomicin prevents degradation of Tom20. Parkin-expressing HeLa cells were pretreated with DMSO (vehicle) or epoxomicin (2  $\mu$ M) for 2 hours, followed by treatment with CCCP (20  $\mu$ M) for 4 hours (4 h), or pulse treatment for 100 min followed by incubation without CCCP for 12 hours (12 h). Fixed cells were stained for Hsp60 (green), Tom20 (red), and nuclei (DAPI, blue). Insets show enlarged views of the boxed area. (D) Quantitation of the 4 h time point in (C). Each cell was scored into one of the 5 indicated bins, depending on the number of Tom20-negative/Hsp60-positive mitochondria found. Error bars represent standard deviations from 3 independent experiments; 100 cells were scored per experiment. (E) Quantitation of the 12 h time point in (C). Each cell was scored as having fragmented mitochondria, tubular mitochondria, or no mitochondria. Error bars represent standard deviation from 3 independent experiments; 100 cells were analyzed per experiment. (F) Epoxomicin prevents Tom20 degradation and mitophagy in SH-SY5Y cells. SH-SY5Y cells with exogenous Parkin were pretreated with DMSO (vehicle) or epoxomicin (2  $\mu$ M) for 2

hours, followed by treatment with CCCP (20  $\mu$ M) for 4 hours (4 h), or pulse treatment for 100 min followed by incubation without CCCP for 24 hours (24 h). Immunostaining was performed as in (C). In the top panel, insets show enlarged views of the boxed area. Arrowheads mark an example of a dispersed mitochondrion positive for Hsp60, but negative for Tom20. Scale bars in A, C, F equal 10  $\mu$ m. (G) MG132 abrogates CCCP-induced mitophagy in MEFs. Wild-type MEFs expressing EGFP-Parkin were pretreated with DMSO (vehicle) or MG132 (5  $\mu$ M), followed by treatment with CCCP (20  $\mu$ M) for 24 hours. Cells were fixed and stained for Hsp60 and nuclei (DAPI). Cells that underwent complete loss of mitochondria were identified as EGFP- and DAPI-positive cells with no Hsp60 signal. Error bars represents standard deviations from 3 independent experiments; 200 cells were analyzed per experiment.

**Supplementary Table 1 | MitoCarta proteins with decreased abundance in mitochondria of CCCP-treated cells**

| Leading IPIs                        | Leading Gene Names | Leading Protein Descriptions                                                                                                                                                                                                                      | Overall Normalized Ratio* | Overall Significance^ |
|-------------------------------------|--------------------|---------------------------------------------------------------------------------------------------------------------------------------------------------------------------------------------------------------------------------------------------|---------------------------|-----------------------|
| IPI00412274                         | MFN1               | Isoform 3 of Mitofusin-1                                                                                                                                                                                                                          | 0.09                      | 6.94E-18              |
| IPI00293073                         | MFN1               | Mitochondrial transmembrane GTPase FZO-2                                                                                                                                                                                                          | 0.10                      | 1.14E-23              |
| IPI00642329                         | MFN2               | Isoform 1 of Mitofusin-2                                                                                                                                                                                                                          | 0.10                      | 2.51E-35              |
| IPI00015602                         | TOMM70A            | Mitochondrial import receptor subunit TOM70                                                                                                                                                                                                       | 0.13                      | 3.78E-40              |
| IPI00807412                         | NT5C3              | Isoform 2 of Cytosolic 5'-nucleotidase 3                                                                                                                                                                                                          | 0.15                      | 1.03E-24              |
| IPI00432452                         | RHOT1              | Isoform 1 of Mitochondrial Rho GTPase 1                                                                                                                                                                                                           | 0.16                      | 4.29E-15              |
| IPI00219778                         | SLMO2              | Protein slowmo homolog 2                                                                                                                                                                                                                          | 0.17                      | 6.01E-15              |
| IPI00877136;IPI00019477;IPI00743132 | SLC25A39           | solute carrier family 25, member 39 isoform a;Isoform 1 of Solute carrier family 25 member 39;Isoform 2 of Solute carrier family 25 member 39                                                                                                     | 0.18                      | 3.17E-10              |
| IPI00032038                         | CPT1A              | Isoform 1 of Carnitine O-palmitoyltransferase 1, liver isoform                                                                                                                                                                                    | 0.23                      | 1.62E-21              |
| IPI00218144                         | COX17              | Cytochrome c oxidase copper chaperone                                                                                                                                                                                                             | 0.23                      | 6.06E-11              |
| IPI00329552                         | MOSC2              | Isoform 1 of MOSC domain-containing protein 2, mitochondrial                                                                                                                                                                                      | 0.26                      | 6.67E-10              |
| IPI00020510                         | CISD1              | CDGSH iron sulfur domain-containing protein 1                                                                                                                                                                                                     | 0.26                      | 8.74E-18              |
| IPI00001638                         | PRELID1            | PRELI domain-containing protein 1, mitochondrial                                                                                                                                                                                                  | 0.28                      | 3.07E-07              |
| IPI00002251                         | PDP2               | [Pyruvate dehydrogenase [acetyl-transferring]]-phosphatase 2, mitochondrial                                                                                                                                                                       | 0.30                      | 2.09E-08              |
| IPI00007266                         | ALAS1              | cDNA FLJ56039, highly similar to 5-aminolevulinate synthase, nonspecific, mitochondrial                                                                                                                                                           | 0.30                      | 6.95E-08              |
| IPI00916131;IPI00447419;IPI00514470 | PISD;C22orf30      | Protein;Isoform 1 of Phosphatidylserine decarboxylase proenzyme;Phosphatidylserine decarboxylase                                                                                                                                                  | 0.32                      | 2.28E-07              |
| IPI00013829                         | TRIAP1             | TP53-regulated inhibitor of apoptosis 1                                                                                                                                                                                                           | 0.34                      | 4.56E-07              |
| IPI00446798                         | MTCP1              | Protein p8 MTCP-1                                                                                                                                                                                                                                 | 0.34                      | 1.03E-06              |
| IPI00328383;IPI00478497;IPI00910479 | SLC25A46           | Putative uncharacterized protein SLC25A46 (Fragment);Solute carrier family 25 member 46;cDNA FLJ60882                                                                                                                                             | 0.37                      | 2.20E-06              |
| IPI00828198;IPI00305258             | MOSC1              | Isoform 2 of MOSC domain-containing protein 1, mitochondrial;Isoform 1 of MOSC domain-containing protein 1, mitochondrial                                                                                                                         | 0.39                      | 1.39E-07              |
| IPI00171445                         | ATAD1              | ATPase family AAA domain-containing protein 1 coiled-coil-helix-coiled-coil-helix domain containing 7 isoform b;coiled-coil-helix-coiled-coil-helix domain containing 7 isoform d;Coiled-coil-helix-coiled-coil-helix domain-containing protein 7 | 0.39                      | 1.84E-07              |
| IPI00552793;IPI00604730;IPI00013279 | CHCHD7             | Coiled-coil-helix-coiled-coil-helix domain-containing protein 7                                                                                                                                                                                   | 0.41                      | 1.35E-05              |
| IPI00844249;IPI00640749             | GPAM               | Glycerol-3-phosphate acyltransferase, mitochondrial;Glycerol 3-phosphate acyltransferase, mitochondrial                                                                                                                                           | 0.42                      | 3.39E-04              |
| IPI00031118                         | ALKBH7             | Alkylated DNA repair protein alkB homolog 7                                                                                                                                                                                                       | 0.42                      | 1.45E-04              |
| IPI00328161;IPI00640341             | FKBP8              | Isoform 2 of FK506-binding protein 8;Isoform 1 of FK506-binding protein 8                                                                                                                                                                         | 0.43                      | 2.81E-06              |

|                                                 |          |                                                                                                                                                                                                                                            |      |          |
|-------------------------------------------------|----------|--------------------------------------------------------------------------------------------------------------------------------------------------------------------------------------------------------------------------------------------|------|----------|
| IPI00465059                                     | RHOT2    | Isoform 1 of Mitochondrial Rho GTPase 2                                                                                                                                                                                                    | 0.44 | 4.94E-06 |
| IPI00061229                                     | OMA1     | Isoform 1 of Metalloendopeptidase OMA1, mitochondrial                                                                                                                                                                                      | 0.45 | 1.17E-04 |
| IPI00290614                                     | ENDOG    | Endonuclease G, mitochondrial                                                                                                                                                                                                              | 0.45 | 1.56E-04 |
| IPI00830136;IPI00552131;IPI00045660;IPI00646750 | C1orf31  | Isoform 2 of Uncharacterized protein C1orf31;cDNA FLJ60021, moderately similar to Protein transport protein Sec61 subunit alpha isoform 1;Isoform 1 of Uncharacterized protein C1orf31;Isoform 3 of Uncharacterized protein C1orf31        | 0.47 | 2.63E-05 |
| IPI00303722                                     | FAM136A  | Protein FAM136A                                                                                                                                                                                                                            | 0.51 | 1.01E-05 |
| IPI00016745;IPI00759584                         | FPGS     | Isoform Mitochondrial of Folylpolyglutamate synthase, mitochondrial;Isoform Cytoplasmic of Folylpolyglutamate synthase, mitochondrial cDNA FLJ61576, highly similar to Mitochondrial fission regulator 1;Mitochondrial fission regulator 1 | 0.53 | 4.50E-03 |
| IPI00910782;IPI00016699                         | MTFR1;-  |                                                                                                                                                                                                                                            | 0.54 | 1.02E-03 |
| IPI00046828                                     | CCDC58   | Coiled-coil domain-containing protein 58                                                                                                                                                                                                   | 0.54 | 4.57E-05 |
| IPI00007052                                     | FIS1     | Mitochondrial fission 1 protein                                                                                                                                                                                                            | 0.55 | 1.33E-03 |
| IPI00025344                                     | NDUFS6   | NADH dehydrogenase [ubiquinone] iron-sulfur protein 6, mitochondrial                                                                                                                                                                       | 0.55 | 5.84E-04 |
| IPI00171459                                     | HSDL1    | Hydroxysteroid dehydrogenase-like protein 1                                                                                                                                                                                                | 0.57 | 3.50E-03 |
| IPI00555597;IPI00032903                         | PTRH2    | Peptidyl-tRNA hydrolase 2, mitochondrial precursor;Peptidyl-tRNA hydrolase 2, mitochondrial                                                                                                                                                | 0.57 | 2.04E-04 |
| IPI00329696                                     | FAM82B   | Regulator of microtubule dynamics protein 1                                                                                                                                                                                                | 0.57 | 1.20E-03 |
| IPI00478450;IPI00472058                         | NDUFB11  | Isoform 2 of NADH dehydrogenase [ubiquinone] 1 beta subcomplex subunit 11, mitochondrial;Neuronal protein                                                                                                                                  | 0.57 | 1.31E-03 |
| IPI00215901;IPI00218988                         | AK2      | Isoform 1 of Adenylate kinase isoenzyme 2, mitochondrial;Isoform 2 of Adenylate kinase isoenzyme 2, mitochondrial                                                                                                                          | 0.57 | 2.40E-04 |
| IPI00065063                                     | DHRS1    | Dehydrogenase/reductase SDR family member 1                                                                                                                                                                                                | 0.58 | 4.74E-03 |
| IPI00008418;IPI00219865                         | DIABLO   | Diablo homolog, mitochondrial precursor;Isoform 2 of Diablo homolog, mitochondrial                                                                                                                                                         | 0.59 | 5.12E-04 |
| IPI00301204                                     | RDH13    | Retinol dehydrogenase 13                                                                                                                                                                                                                   | 0.60 | 2.61E-03 |
| IPI00011770                                     | NDUFA4   | NADH dehydrogenase [ubiquinone] 1 alpha subcomplex subunit 4                                                                                                                                                                               | 0.62 | 5.47E-03 |
| IPI00296190;IPI00646289;IPI00646889             | C10orf58 | Uncharacterized protein C10orf58;25 kDa protein;Putative uncharacterized protein C10orf58                                                                                                                                                  | 0.63 | 6.38E-03 |
| IPI00028491                                     | AGPAT5   | 1-acyl-sn-glycerol-3-phosphate acyltransferase epsilon                                                                                                                                                                                     | 0.63 | 6.85E-03 |
| IPI00001589                                     | TIMM13   | Mitochondrial import inner membrane translocase subunit Tim13                                                                                                                                                                              | 0.64 | 2.31E-03 |
| IPI00013459;IPI00791036;IPI00556190             | NDUFB5   | NADH dehydrogenase [ubiquinone] 1 beta subcomplex subunit 5, mitochondrial;22 kDa protein;NDUFB5 protein                                                                                                                                   | 0.64 | 8.53E-03 |
| IPI00028376                                     | TIMM8A   | Mitochondrial import inner membrane translocase subunit Tim8 A                                                                                                                                                                             | 0.65 | 3.23E-03 |
| IPI00419266                                     | NDUFA6   | NADH dehydrogenase (ubiquinone) 1 alpha subcomplex, 6, 14kDa                                                                                                                                                                               | 0.65 | 3.51E-03 |
| IPI00020332                                     | ARG2     | Arginase-2, mitochondrial                                                                                                                                                                                                                  | 0.68 | 7.41E-03 |

Mitochondria from Parkin-expressing HeLa S3 cells with and without CCCP (2 hours) were compared.

\*Combined ratio from three independent mass spectrometry experiments consisting of two independent biological samples, and one technical replicate. The ratio represents the protein level in mitochondria of CCCP-treated cells divided by the level in untreated cells.

^Corresponds to the significance in MaxQuant

**Supplementary Table 2 | MitoCarta proteins enriched in mitochondria of CCCP-treated cells**

| <b>Leading IPIs</b>         | <b>Leading Gene Names</b> | <b>Leading Protein Descriptions</b>                                          | <b>Overall Normalized Ratio*</b> | <b>Overall Significance<sup>^</sup></b> |
|-----------------------------|---------------------------|------------------------------------------------------------------------------|----------------------------------|-----------------------------------------|
| IPI00026781                 | FASN                      | Fatty acid synthase                                                          | 4.08                             | 4.03E-07                                |
| IPI00216298                 | TXN                       | Thioredoxin                                                                  | 3.20                             | 2.12E-05                                |
| IPI00220301                 | PRDX6                     | Peroxiredoxin-6                                                              | 3.19                             | 3.71E-03                                |
| IPI00604590;<br>IPI00795292 | NME2;NME1-<br>NME2;NME2   | Nucleoside diphosphate<br>kinase;NME1-NME2 protein<br>Isoform 1 of L-lactate | 2.36                             | 1.20E-03                                |
| IPI00217966                 | LDHA                      | dehydrogenase A chain<br>L-lactate dehydrogenase B                           | 2.10                             | 4.33E-03                                |
| IPI00219217                 | LDHB                      | chain                                                                        | 1.96                             | 8.75E-03                                |

Mitochondria from Parkin-expressing HeLa S3 cells with and without CCCP (2 hours) were compared.

\*Combined ratio from three independent mass spectrometry experiments consisting of two independent samples and one technical replicate. The ratio represents the protein level in mitochondria of CCCP-treated cells divided by the level in untreated cells.

<sup>^</sup>Corresponds to significance in MaxQuant



**Supplementary Table 3 | Non-MitoCarta proteins enriched in mitochondria of CCCP-treated cells**

| <b>Leading IPIs</b>                                                     | <b>Leading Gene Names</b>   | <b>Leading Protein Descriptions</b>                                                                                                                                                                                                                             | <b>Overall Normalized Ratio*</b> | <b>Overall Significance<sup>^</sup></b> |
|-------------------------------------------------------------------------|-----------------------------|-----------------------------------------------------------------------------------------------------------------------------------------------------------------------------------------------------------------------------------------------------------------|----------------------------------|-----------------------------------------|
| IPI00005254                                                             | PARK2                       | Isoform 1 of E3 ubiquitin-protein ligase parkin                                                                                                                                                                                                                 | 13.5                             | 4.42E-20                                |
| IPI00179330                                                             | UBB:RPS27A:UBC              | ubiquitin and ribosomal protein S27a precursor                                                                                                                                                                                                                  | 8.9                              | 9.58E-15                                |
| IPI00783855;IPI00871941;IPI00299920;IPI00887954                         | NBR1;LOC727732;LOC100133166 | neighbor of BRCA1 gene 1;Isoform 1 of Next to BRCA1 gene 1 protein;69 kDa protein;hypothetical protein isoform 2                                                                                                                                                | 8.3                              | 2.90E-06                                |
| IPI00235412;IPI00871742;IPI00146935;IPI00555883;IPI00037283;IPI00473085 | DNM1L                       | cDNA FLJ56381, highly similar to Dynamin-1-like protein;cDNA FLJ55044, highly similar to Dynamin-1-like protein;Isoform 1 of Dynamin-1-like protein;Isoform 2 of Dynamin-1-like protein;Isoform 5 of Dynamin-1-like protein;Isoform 4 of Dynamin-1-like protein | 6.3                              | 4.78E-07                                |
| IPI00179473                                                             | SQSTM1                      | Isoform 1 of Sequestosome-1                                                                                                                                                                                                                                     | 5.8                              | 1.75E-06                                |
| IPI00151462;IPI00220482                                                 | MAP1LC3B2;MAP1LC3B          | Microtubule-associated proteins 1A/1B light chain 3 beta 2;Microtubule-associated proteins 1A/1B light chain 3B                                                                                                                                                 | 5.4                              | 3.70E-06                                |
| IPI00009146                                                             | TRAFD1                      | TRAF-type zinc finger domain-containing protein 1                                                                                                                                                                                                               | 4.9                              | 1.48E-04                                |
| IPI00219622                                                             | PSMA2                       | Proteasome subunit alpha type-2                                                                                                                                                                                                                                 | 4.2                              | 8.08E-05                                |
| IPI00479306                                                             | PSMB5                       | Proteasome subunit beta type-5                                                                                                                                                                                                                                  | 4.2                              | 4.21E-04                                |
| IPI00640197;IPI00020416                                                 | TPP2                        | Tripeptidyl peptidase II;Tripeptidyl-peptidase 2                                                                                                                                                                                                                | 4.1                              | 2.18E-03                                |
| IPI00472442;IPI00016832;IPI00871889                                     | PSMA1                       | Isoform Long of Proteasome subunit alpha type-1;Isoform Short of Proteasome subunit alpha type-1;Proteasome subunit alpha type                                                                                                                                  | 4.0                              | 5.38E-04                                |
| IPI00028004                                                             | PSMB3                       | Proteasome subunit beta type-3                                                                                                                                                                                                                                  | 4.0                              | 6.20E-04                                |
| IPI00000811                                                             | PSMB6                       | Proteasome subunit beta type-6                                                                                                                                                                                                                                  | 3.9                              | 2.30E-04                                |
| IPI00642126                                                             | KIAA1618                    | Isoform 1 of Protein ALO17                                                                                                                                                                                                                                      | 3.9                              | 1.38E-03                                |
| IPI00031461                                                             | GDI2                        | cDNA FLJ60299, highly similar to Rab GDP dissociation inhibitor beta                                                                                                                                                                                            | 3.8                              | 1.76E-04                                |
| IPI00008223;IPI006425                                                   | RAD23B                      | UV excision repair protein RAD23 homolog B;cDNA                                                                                                                                                                                                                 | 3.7                              | 4.55E-03                                |

|                                                                         |           |                                                                                                                                                                                                         |     |          |
|-------------------------------------------------------------------------|-----------|---------------------------------------------------------------------------------------------------------------------------------------------------------------------------------------------------------|-----|----------|
| 49                                                                      |           | FLJ56531, highly similar to UV excision repair protein RAD23 homolog B                                                                                                                                  |     |          |
| IPI00029623                                                             | PSMA6     | Proteasome subunit alpha type-6                                                                                                                                                                         | 3.7 | 1.18E-03 |
| IPI00555956                                                             | PSMB4     | Proteasome subunit beta type-4                                                                                                                                                                          | 3.7 | 1.96E-03 |
| IPI00024175                                                             | PSMA7     | Isoform 1 of Proteasome subunit alpha type-7                                                                                                                                                            | 3.7 | 1.29E-03 |
| IPI00299155;IPI00790207                                                 | PSMA4     | Proteasome subunit alpha type-4;27 kDa protein                                                                                                                                                          | 3.6 | 4.70E-04 |
| IPI00419249;IPI00171199                                                 | PSMA3     | Isoform 1 of Proteasome subunit alpha type-3;Isoform 2 of Proteasome subunit alpha type-3                                                                                                               | 3.6 | 4.85E-04 |
| IPI00005495;IPI00219863;IPI00607670;IPI00872048;IPI00895831;IPI00895820 | ATXN3     | Isoform 1 of Ataxin-3;Isoform 2 of Ataxin-3;ATXN3 protein;42 kDa protein;ataxin 3 isoform 3;ataxin 3 isoform 4                                                                                          | 3.6 | 6.08E-03 |
| IPI00013446                                                             | PSCA      | Prostate stem cell antigen<br>Small glutamine-rich tetratricopeptide repeat-containing protein alpha;cDNA FLJ56566, highly similar to Small glutamine-rich tetratricopeptiderepeat-containing protein A | 3.6 | 2.63E-03 |
| IPI00013949;IPI00908410                                                 | SGTA      | Aspartate aminotransferase, cytoplasmic                                                                                                                                                                 | 3.5 | 3.01E-03 |
| IPI00219029                                                             | GOT1      | Gamma-aminobutyric acid receptor-associated protein-like 2                                                                                                                                              | 3.5 | 7.23E-04 |
| IPI00026358                                                             | GABARAPL2 | cAMP-dependent protein kinase type I-alpha regulatory subunit                                                                                                                                           | 3.4 | 7.88E-04 |
| IPI00021831                                                             | PRKAR1A   | Proteasome subunit beta type-1                                                                                                                                                                          | 3.3 | 4.16E-03 |
| IPI00025019                                                             | PSMB1     | Annexin A3                                                                                                                                                                                              | 3.3 | 2.66E-03 |
| IPI00024095                                                             | ANXA3     | V-type proton ATPase subunit B, brain isoform                                                                                                                                                           | 3.3 | 4.85E-03 |
| IPI00007812                                                             | ATP6V1B2  | Putative uncharacterized protein HPRT1;Hypoxanthine-guanine phosphoribosyltransferase                                                                                                                   | 3.3 | 1.64E-05 |
| IPI00873466;IPI00218493                                                 | HPRT1     | Proteasome subunit alpha type-5                                                                                                                                                                         | 3.2 | 5.49E-03 |
| IPI00291922                                                             | PSMA5     | Alanyl-tRNA synthetase, cytoplasmic                                                                                                                                                                     | 3.2 | 9.68E-04 |
| IPI00027442                                                             | AARS      | inosine monophosphate dehydrogenase 1 isoform a;inosine monophosphate dehydrogenase 1 isoform c;inosine monophosphate                                                                                   | 3.2 | 3.54E-03 |
| IPI00375527;IPI00856084;IPI00442268;IPI00644730;IPI009                  | IMPDH1    |                                                                                                                                                                                                         | 3.2 | 1.70E-03 |

|                                                 |           |                                                                                                                                                                                                                                                                                                                                                                               |     |          |
|-------------------------------------------------|-----------|-------------------------------------------------------------------------------------------------------------------------------------------------------------------------------------------------------------------------------------------------------------------------------------------------------------------------------------------------------------------------------|-----|----------|
| 16697;IPI00<br>916378;IPI0<br>0647813           |           | dehydrogenase 1 isoform<br>d;Isoform 3 of Inosine-5'-<br>monophosphate dehydrogenase<br>1;IMP (Inosine monophosphate)<br>dehydrogenase 1, isoform<br>CRA_d;inosine monophosphate<br>dehydrogenase 1 isoform<br>f;Isoform 2 of Inosine-5'-<br>monophosphate dehydrogenase<br>1<br>Isoform 1 of TBC1 domain<br>family member 15;Isoform 2 of<br>TBC1 domain family member<br>15 |     |          |
| IPI0015464<br>5;IPI007946<br>13                 | TBC1D15   |                                                                                                                                                                                                                                                                                                                                                                               | 3.2 | 6.18E-03 |
| IPI0090311<br>9;IPI000051<br>02;IPI00642<br>393 | SMS       | 45 kDa protein;Isoform 1 of<br>Spermine synthase;Isoform 2 of<br>Spermine synthase                                                                                                                                                                                                                                                                                            | 3.2 | 6.36E-03 |
| IPI0032963<br>3                                 | TARS      | Threonyl-tRNA synthetase,<br>cytoplasmic                                                                                                                                                                                                                                                                                                                                      | 3.1 | 4.26E-03 |
| IPI0002744<br>4                                 | SERPINB1  | Leukocyte elastase inhibitor<br>cDNA FLJ60782, highly similar<br>to Rho-GTPase-activating<br>protein 1                                                                                                                                                                                                                                                                        | 3.1 | 1.96E-03 |
| IPI0002056<br>7                                 | ARHGAP1   |                                                                                                                                                                                                                                                                                                                                                                               | 3.1 | 7.38E-03 |
| IPI0000385<br>6                                 | ATP6V1E1  | V-type proton ATPase subunit E<br>1<br>cDNA FLJ56437, highly similar<br>to Phosphoserine<br>aminotransferase                                                                                                                                                                                                                                                                  | 3.1 | 4.77E-03 |
| IPI0000173<br>4                                 | PSAT1     |                                                                                                                                                                                                                                                                                                                                                                               | 2.9 | 6.62E-03 |
| IPI0046502<br>8                                 | TPI1      | Isoform 1 of Triosephosphate<br>isomerase                                                                                                                                                                                                                                                                                                                                     | 2.9 | 7.60E-05 |
| IPI0000781<br>4                                 | ATP6V1C1  | V-type proton ATPase subunit C<br>1                                                                                                                                                                                                                                                                                                                                           | 2.9 | 7.24E-03 |
| IPI0000768<br>2                                 | ATP6V1A   | V-type proton ATPase catalytic<br>subunit A                                                                                                                                                                                                                                                                                                                                   | 2.9 | 2.45E-03 |
| IPI0041345<br>1;IPI007493<br>98                 | SERPINB6  | Putative uncharacterized protein<br>DKFZp686I04222;Serpins B6<br>cDNA FLJ56065, highly similar<br>to Pyruvate kinase isozyme<br>M1;Isoform M1 of Pyruvate<br>kinase isozymes M1/M2                                                                                                                                                                                            | 2.8 | 4.43E-03 |
| IPI0047918<br>6;IPI002206<br>44                 | PKM2      |                                                                                                                                                                                                                                                                                                                                                                               | 2.8 | 1.25E-04 |
| IPI0029151<br>0                                 | IMPDH2    | Inosine-5'-monophosphate<br>dehydrogenase 2                                                                                                                                                                                                                                                                                                                                   | 2.8 | 2.96E-03 |
| IPI0002746<br>3                                 | S100A6    | Protein S100-A6                                                                                                                                                                                                                                                                                                                                                               | 2.8 | 9.70E-03 |
| IPI0001415<br>1                                 | PSMD6     | 26S proteasome non-ATPase<br>regulatory subunit 6                                                                                                                                                                                                                                                                                                                             | 2.7 | 6.22E-03 |
| IPI0001380<br>8                                 | ACTN4     | Alpha-actinin-4                                                                                                                                                                                                                                                                                                                                                               | 2.6 | 5.46E-03 |
| IPI0055556<br>5                                 | HSP90AB4P | Putative heat shock protein HSP<br>90-beta 4                                                                                                                                                                                                                                                                                                                                  | 2.6 | 9.08E-03 |
| IPI0015668<br>9                                 | VAT1      | Synaptic vesicle membrane<br>protein VAT-1 homolog                                                                                                                                                                                                                                                                                                                            | 2.6 | 5.89E-03 |
| IPI0079633                                      | ALDOA     | 45 kDa protein;Fructose-                                                                                                                                                                                                                                                                                                                                                      | 2.6 | 4.26E-04 |

|                                 |          |                                                                                                                                                                          |     |          |
|---------------------------------|----------|--------------------------------------------------------------------------------------------------------------------------------------------------------------------------|-----|----------|
| 3;IPI004654<br>39               |          | bisphosphate aldolase A                                                                                                                                                  |     |          |
| IPI0078409<br>0                 | CCT8     | T-complex protein 1 subunit<br>theta                                                                                                                                     | 2.6 | 6.45E-03 |
| IPI0029056<br>6                 | TCPI     | T-complex protein 1 subunit<br>alpha                                                                                                                                     | 2.5 | 7.02E-03 |
| IPI0001226<br>8                 | PSMD2    | 26S proteasome non-ATPase<br>regulatory subunit 2                                                                                                                        | 2.5 | 6.38E-04 |
| IPI0032980<br>1;IPI008723<br>79 | ANXA5    | Annexin A5;Putative<br>uncharacterized protein ANXA5<br>(Fragment)                                                                                                       | 2.5 | 7.84E-03 |
| IPI0001595<br>4                 | SAR1A    | GTP-binding protein SAR1a                                                                                                                                                | 2.5 | 7.87E-03 |
| IPI0021901<br>8                 | GAPDH    | Glyceraldehyde-3-phosphate<br>dehydrogenase                                                                                                                              | 2.5 | 6.83E-04 |
| IPI0001767<br>2;IPI008711<br>40 | NP       | cDNA FLJ25678 fis, clone<br>TST04067, highly similar to<br>PURINE NUCLEOSIDE<br>PHOSPHORYLASE;Purine<br>nucleoside phosphorylase                                         | 2.5 | 8.41E-03 |
| IPI0046524<br>8                 | ENO1     | Isoform alpha-enolase of Alpha-<br>enolase                                                                                                                               | 2.3 | 1.49E-03 |
| IPI0038247<br>0;IPI007842<br>95 | HSP90AA1 | heat shock protein 90kDa alpha<br>(cytosolic), class A member 1<br>isoform 1;Isoform 1 of Heat<br>shock protein HSP 90-alpha                                             | 2.2 | 2.46E-03 |
| IPI0041467<br>6                 | HSP90AB1 | Heat shock protein HSP 90-beta                                                                                                                                           | 2.2 | 2.62E-03 |
| IPI0000007<br>0                 | LDLR     | Low-density lipoprotein receptor                                                                                                                                         | 2.1 | 3.77E-03 |
| IPI0001201<br>1                 | CFL1     | Cofilin-1<br>cDNA FLJ56285, highly similar<br>to ADP-ribosylation factor-like<br>protein 8B;cDNA FLJ61158,<br>highly similar to ADP-<br>ribosylation factor-like protein | 2.0 | 7.35E-03 |
| IPI0001887<br>1;IPI007890<br>69 | ARL8B;-  | 8B                                                                                                                                                                       | 2.0 | 7.90E-03 |
| IPI0001122<br>9                 | CTSD     | Cathepsin D                                                                                                                                                              | 2.0 | 7.93E-03 |

Mitochondria from Parkin-expressing HeLa S3 cells with and without CCCP (2 hours) were compared.

\*Combined ratio from three independent mass spectrometry experiments consisting of two independent biological samples and one technical replicate. The ratio represents the protein level in mitochondria of CCCP-treated cells divided by the level in untreated cells.

^Corresponds to significance in MaxQuant

**Supplementary Table 4 | Non-MitoCarta proteins with decreased abundance in mitochondria of CCCP-treated cells**

| Leading IPIs                        | Leading Gene Names | Leading Protein Descriptions                                                                                                                              | Overall H/L Normalized Ratio* | Overall H/L Significance <sup>^</sup> |
|-------------------------------------|--------------------|-----------------------------------------------------------------------------------------------------------------------------------------------------------|-------------------------------|---------------------------------------|
| IPI00852851;IPI0008732              | TRABD              | 43 kDa protein;Isoform 1 of TraB domain-containing protein                                                                                                | 0.19                          | 3.64E-13                              |
| IPI00432065                         | C11orf83           | Uncharacterized protein C11orf83                                                                                                                          | 0.21                          | 5.04E-12                              |
| IPI00855998                         | CENPF              | Centromere protein F                                                                                                                                      | 0.21                          | 6.20E-09                              |
| IPI00640118                         | LOC100131801       | similar to hCG2036585 Chromosome 20 open reading frame 149;Isoform 1 of                                                                                   | 0.21                          | 9.37E-09                              |
| IPI00607900;IPI00013278             | C20orf149          | UPF0362 protein C20orf149                                                                                                                                 | 0.23                          | 2.26E-08                              |
| IPI00106646;IPI00009794;IPI00514755 | SDF4               | 45 kDa calcium-binding protein;stromal cell derived factor 4 precursor;Stromal cell derived factor 4                                                      | 0.28                          | 9.88E-09                              |
| IPI00400948;IPI00916639             | C2orf64            | Uncharacterized protein C2orf64;8 kDa protein                                                                                                             | 0.29                          | 1.57E-06                              |
| IPI00168047;IPI00845421             | FAM73A             | Isoform 1 of Protein FAM73A;Isoform 2 of Protein FAM73A                                                                                                   | 0.30                          | 2.57E-06                              |
| IPI00009817;IPI00878815             | CHCHD8             | Isoform 2 of Coiled-coil-helix-coiled-coil-helix domain-containing protein 8;Isoform 1 of Coiled-coil-helix-coiled-coil-helix domain-containing protein 8 | 0.32                          | 5.94E-10                              |
| IPI00555820;IPI00894163             | MYO19              | cDNA FLJ61052, highly similar to Homo sapiens myosin head domain containing 1 (MYOHD1), transcript variant 2, mRNA;Isoform 1 of Myosin-XIX                | 0.34                          | 3.43E-07                              |
| IPI00791574;IPI00030531;IPI00794566 | SLMAP              | Isoform 1 of Sarcolemmal membrane-associated protein;Isoform 3 of Sarcolemmal membrane-associated protein                                                 | 0.34                          | 5.55E-07                              |
| IPI00017979;IPI00478216             | FAM54A             | Isoform 1 of Protein FAM54A;Isoform 2 of Protein FAM54A                                                                                                   | 0.35                          | 3.78E-05                              |
| IPI00877014;IPI00290544             | GDAP1              | ganglioside-induced differentiation-associated protein 1 isoform a;Ganglioside-induced differentiation-associated protein 1                               | 0.40                          | 1.85E-04                              |
| IPI00014456;IPI00                   | STRN               | Isoform 1 of Striatin;Isoform 2                                                                                                                           | 0.43                          | 4.48E-04                              |

|                             |          |                                                                                                                                                     |      |          |
|-----------------------------|----------|-----------------------------------------------------------------------------------------------------------------------------------------------------|------|----------|
| 654594                      |          | of Striatin                                                                                                                                         |      |          |
| IPI00303753                 | C1orf163 | Hcp beta-lactamase-like protein<br>C1orf163                                                                                                         | 0.45 | 7.83E-06 |
| IPI00514622                 | RANBP6   | Ran-binding protein 6<br>cDNA FLJ58573, highly<br>similar to Exonuclease 3'-5'<br>domain-like-containing protein                                    | 0.48 | 4.08E-04 |
| IPI00465113;IPI00<br>915852 | EXDL2    | 2;Exonuclease 3'-5' domain-<br>like-containing protein 2                                                                                            | 0.50 | 4.19E-04 |
| IPI00015890                 | CCRN4L   | Nocturnin                                                                                                                                           | 0.52 | 3.47E-03 |
| IPI00413436                 | COX19    | Cytochrome c oxidase<br>assembly protein COX19                                                                                                      | 0.53 | 1.36E-03 |
| IPI00295542;IPI00<br>893190 | NUCB1    | Nucleobindin-1;cDNA<br>FLJ52898, highly similar to<br>Nucleobindin-1                                                                                | 0.55 | 2.54E-03 |
| IPI00465410                 | C12orf73 | Uncharacterized protein<br>C12orf73                                                                                                                 | 0.55 | 2.76E-03 |
| IPI00853224                 | STARD7   | StAR-related lipid transfer<br>protein 7, mitochondrial<br>cDNA FLJ39671 fis, clone<br>SMINT2008917;Coiled-coil-<br>helix-coiled-coil-helix domain- | 0.56 | 1.76E-03 |
| IPI00305552;IPI00<br>395372 | CHCHD5   | containing protein 5                                                                                                                                | 0.57 | 9.07E-03 |
| IPI00024619                 | C16orf61 | UPF0287 protein C16orf61                                                                                                                            | 0.62 | 5.03E-03 |

Mitochondria from Parkin-expressing HeLa S3 cells with and without CCCP (2 hours) were compared.

\*The protein level in the mitochondria of CCCP-treated cells divided by the level in untreated cells.

^Corresponds to the significance in MaxQuant

Chan *et al.*, Supplemental Figure S1

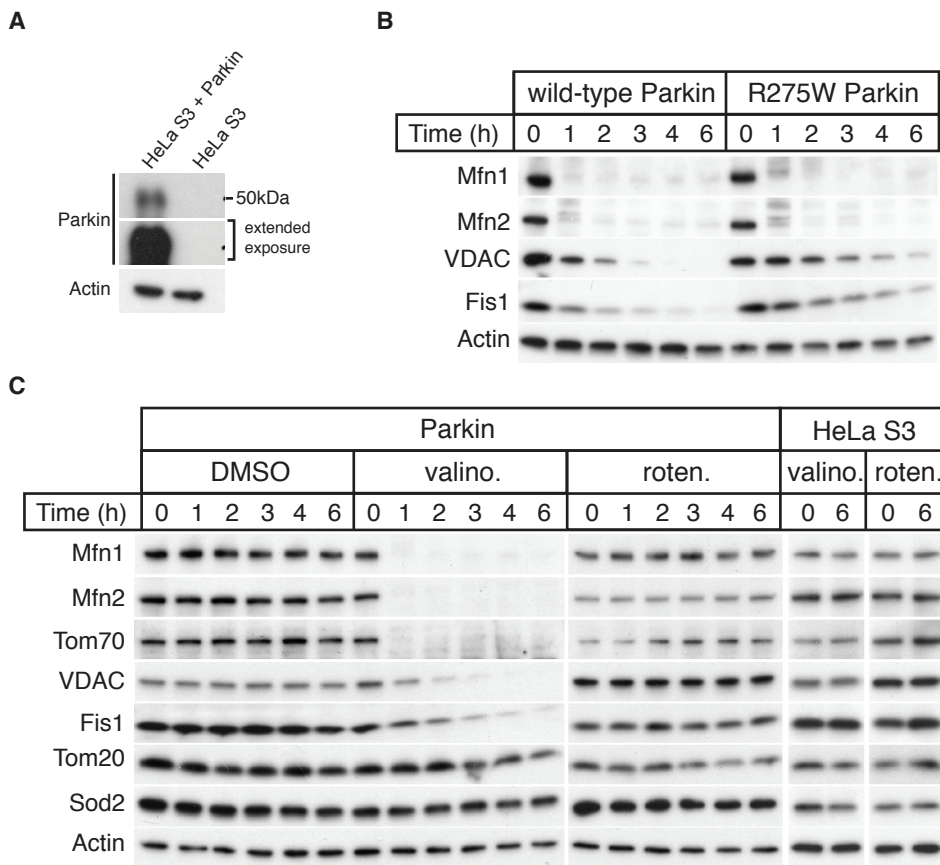

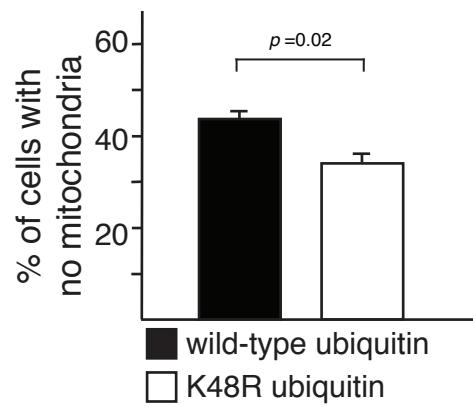



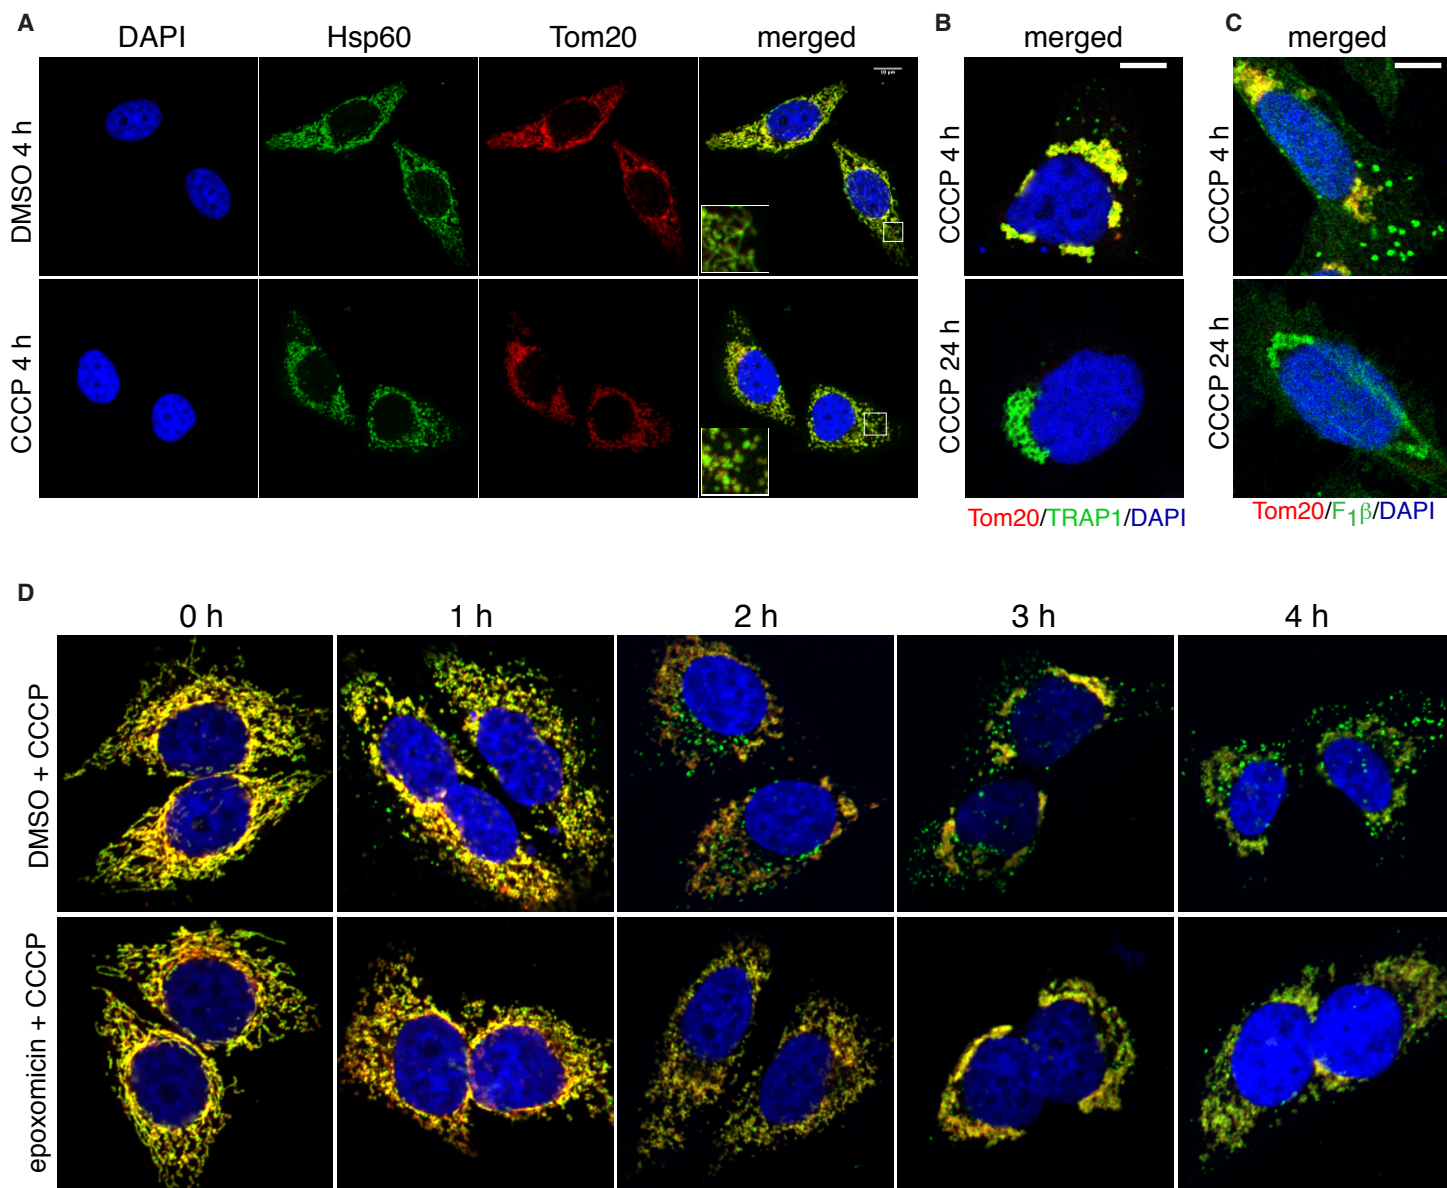

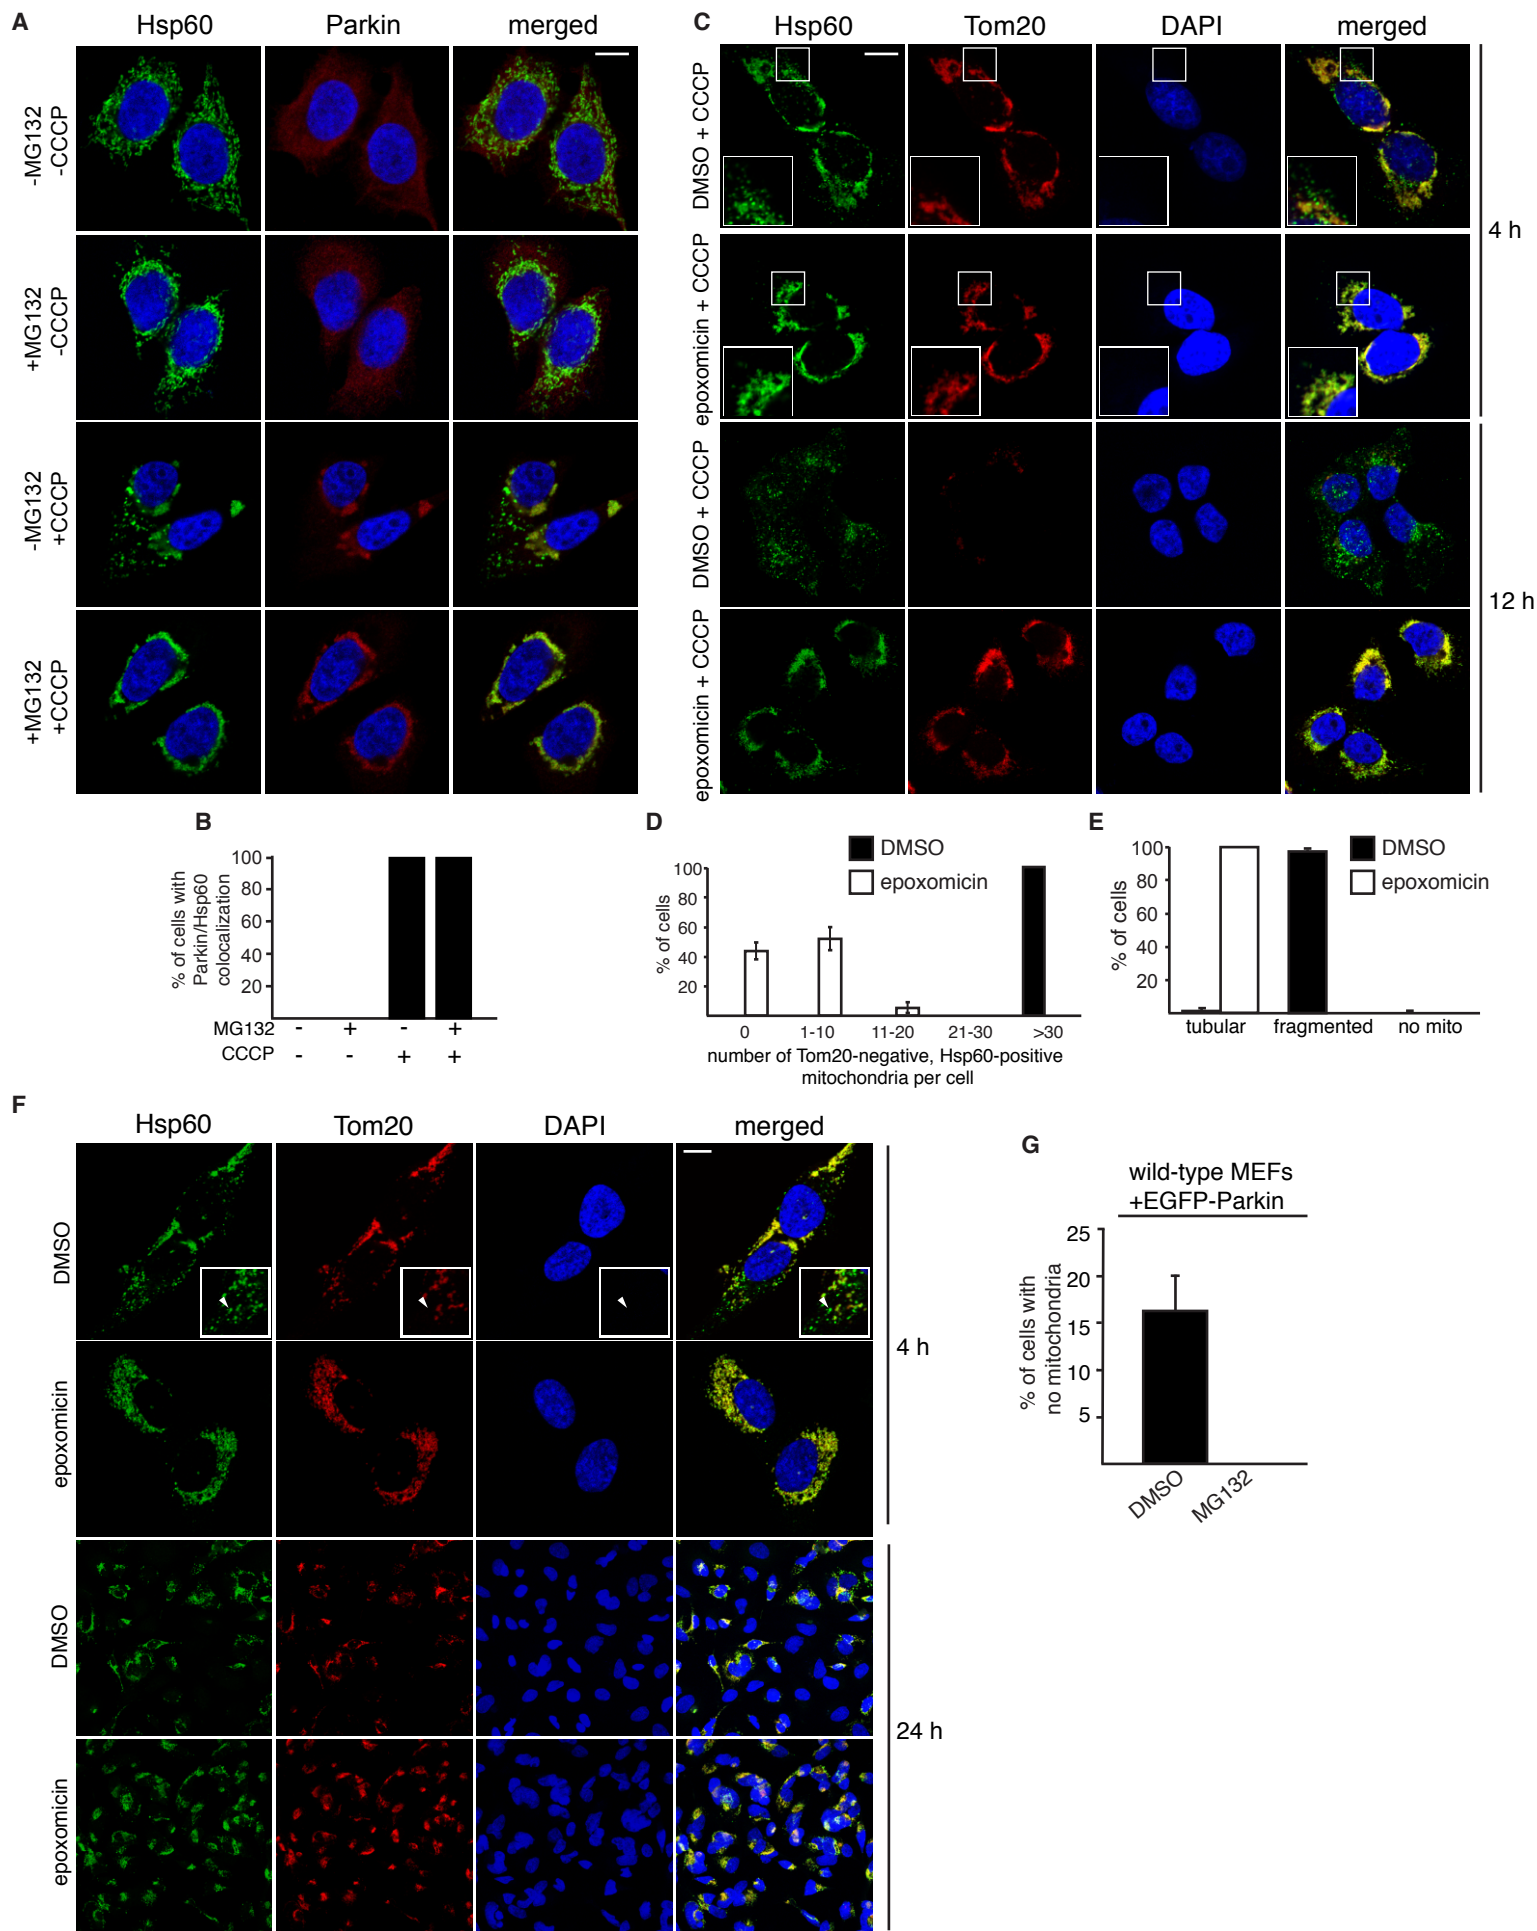

Supplement: supp_ddr048_ddr048supp.pdf [file supp_ddr048_ddr048supp.pdf]
